## Severity and type of lymphoma are associated with aortic 18-fluorodeoxyglucose (FDG) positron emission tomographic uptake assessed by FDG PET/CT imaging

I. Koutagiar<sup>1</sup>, A. Georgakopoulos<sup>2</sup>, A. Pouli<sup>3</sup>, A. Sioni<sup>3</sup>, S. Giannouli<sup>4</sup>, E. Solomou<sup>1</sup>, D. Terentes-Printzios<sup>1</sup>, I. Karakitsios<sup>2</sup>, P. Kafouris<sup>5</sup>, A. Gaitanis<sup>2</sup>, A. Petrocheilou<sup>6</sup>, N. Pianou<sup>2</sup>, D. Tousoulis<sup>1</sup>, C. Vlachopoulos<sup>1</sup>, C. Anagnostopoulos<sup>2</sup>

<sup>1</sup>Hippokraton General Hospital, 1st Cardiology Department, Athens Medical School, Athens, Greece; <sup>2</sup>Academy of Athens Biomedical Research Foundation, Center for Experimental Surgery, Clinical and Translational Research, Biomedical Research Foundation, Athens, Greece; <sup>3</sup>Agios Savvas General Oncology Hospital, Department of Hematology, Athens, Greece; <sup>4</sup>Hippokraton General Hospital, Department of Hematology, Athens, Greece; <sup>5</sup>Academy of Athens Biomedical Research Foundation, Center of Systems Biology, Athens, Greece; <sup>6</sup>Hippokraton General Hospital, Athens, Greece

**Funding Acknowledgement:** Type of funding source: None

**Introduction:** There is increasing evidence that metabolic disease burden in lymphoma influence patients' outcome. However, the impact of disease severity on cardiovascular system remains unknown.

**Purpose:** To assess whether lymphoma is associated with arterial inflammation by examining the relationship between disease metabolic burden and arterial fluorodeoxyglucose (FDG) uptake.

**Methods:** Sixty-two patients (43 male, mean age 58±18 years) with Hodgkin (n=29) or non-Hodgkin lymphoma (n=33) before chemotherapy and two separate control groups of 14 and 16 healthy individuals for Hodgkin and non-Hodgkin population respectively, with similar age, sex and cardiovascular risk factors, underwent FDG positron emission tomography (FDG-PET/CT) imaging. Disease severity was quantified by metabolic tumor volume (MTV) and total lesion glycolysis (TLG) corresponding to standard uptake values (SUV)  $\geq 41\%$  or  $\geq 2.5$  of maximum SUV within lymphoma regions, and aortic FDG uptake by target-to-background ratio (TBR). Serum high sensitivity-C-reactive protein (hs-CRP), white blood

count (WBC), ratio of neutrophils to lymphocytes (N/L), albumin and lactic acid dehydrogenase (LDH) values were measured for patient group.

**Results:** MTV and TLG measurements correlated significantly with hs-CRP, WBC, N/L ratio, albumin and LDH table 1. Patients with non-Hodgkin or Hodgkin lymphoma had increased aortic TBR compared to controls ( $p=0.001$  and  $p=0.023$ , respectively). Aortic TBR was higher in patients with stage III-IV disease compared to those with stage I-I ( $p=0.046$ ). There were significant associations between aortic FDG uptake and MTV values, which remained significant after adjustment for confounders ( $\beta=0.353$ ,  $p=0.001$ , adjusted  $R^2=0.318$  for MTV<sub>41%</sub>,  $\beta=0.442$ ,  $p=0.001$ , adjusted  $R^2=0.269$  for MTV<sub>2.5</sub>), Figure 1.

**Conclusions:** Aortic wall FDG uptake is related with disease severity indicating a vascular effect of lymphoma, as well as a new potential role of molecular imaging in cardio-oncology for evaluating disease severity and its consequences to vascular beds with a single examination.

Table 1. Pearson correlation between disease burden indices and serum biomarkers

| PET derived measurements | Hs-CRP  | P-value | Neutrophils to lymphocytes ratio | P-value |
|--------------------------|---------|---------|----------------------------------|---------|
| MTV <sub>41%</sub>       | 0.306   | 0.016   | 0.317                            | 0.026   |
| MTV <sub>2.5</sub>       | 0.312   | 0.013   | 0.389                            | 0.006   |
|                          | Albumin | P-value | LDH                              | P-value |
| MTV <sub>41%</sub>       | -0.281  | 0.044   | 0.465                            | <0.001  |
| MTV <sub>2.5</sub>       | -0.419  | 0.002   | 0.616                            | <0.001  |

PET: Positron Emission Tomography; Hs-CRP: High-sensitivity C-reactive protein; LDH: lactic acid dehydrogenase; MTV: metabolic tumor volume.

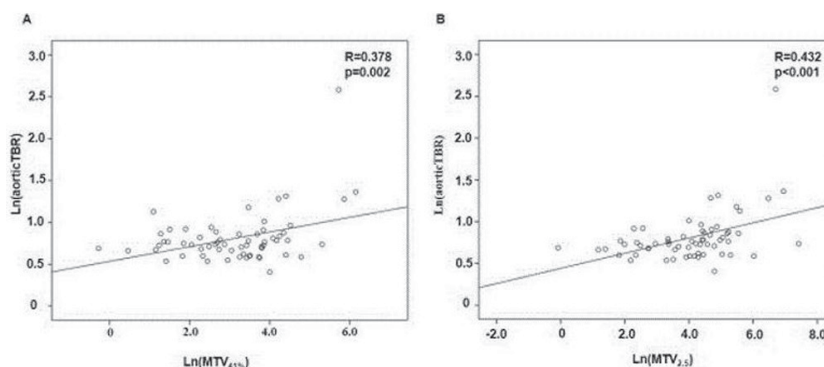

Scatterplots of the aortic target to background ratio (TBR) and Metabolic Tumor Volume  $\geq 41\%$  (MTV<sub>41%</sub>) and  $\geq 2.5$  (MTV<sub>2.5</sub>) of the maximum SUV (A and B, respectively).

Figure 1
